# Supplementary material for: Coupling Square Wave Anodic Stripping Voltammetry with Support Vector Regression to Detect the Concentration of Lead in Soil under the Interference of Copper Accurately
Source: MDPI journal article supplement (doi:10.3390/s20236792), 2020-11-27
Supplement: s1 [file s1]

Supplementary Materials

# Coupling square wave anodic stripping voltammetry with support vector regression to detect the concentration of lead in soil under the interference of copper accurately

Ning Liu <sup>1,2</sup>, Guo Zhao <sup>3</sup>, and Gang Liu <sup>1,2</sup>

<sup>1</sup> Key Laboratory of Modern Precision Agriculture System Integration Research, Ministry of Education of China, China Agricultural University, Beijing, 100083, China; ningliu@cau.edu.cn (N.L.).

<sup>2</sup> Key Laboratory of Agricultural information acquisition technology, Ministry of Agriculture and Rural Affairs of China, China Agricultural University, Beijing 100083, China; pac@cau.edu.cn (G.L.)

<sup>3</sup> College of Artificial Intelligence, Nanjing Agricultural University, Nanjing, 210031, China; zhaoguo@njau.edu.cn (G.Z.)

\* Correspondence: pac@cau.edu.cn; Tel.: +86-1391-007-5680 (G.L.)

## 3.1. Electrochemical Activity of the Bare GCE

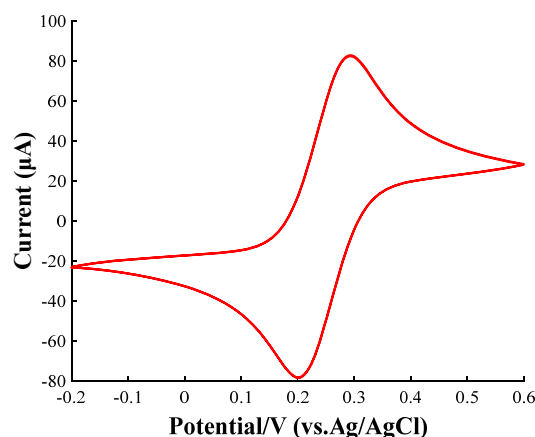

**Figure S1.** CV curve of the bare GCE in a mixture solution with 5 mM  $[\text{Fe}(\text{CN})_6]^{3-/4-}$  and 0.1 M KCl.

## 3.6.2 Analysis of the SVR Model Result for Pb(II) Concentration Detection

**Table S1.** Prediction results of the SVR model optimized by grid search for Pb(II) concentration.

| Dataset          | $R^2$  | RMSE ( $\mu\text{g/L}$ ) |
|------------------|--------|--------------------------|
| training dataset | 0.9954 | 0.9891                   |
| test dataset     | 0.9942 | 1.1204                   |

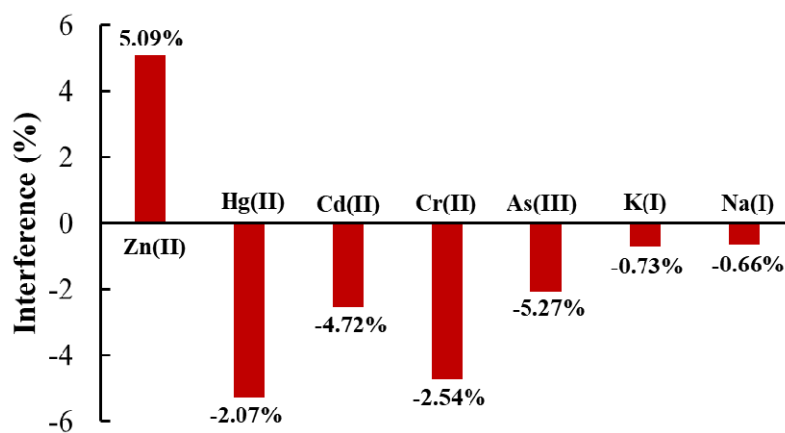

**Figure S2.** Interference of other cations on the stripping peak current of Pb(II) .
